# Supplementary material for: Determining the microenvironment and protonation state of quercetin encapsulated in pillar[5]arene-based supramolecular nanocarriers
Source: Royal Society of Chemistry journal article supplement (doi:10.1039/d6ra02504h), 2026-05-26
Supplement: d6ra02504h1.pdf [file d6ra02504h1.pdf]

## Supplementary Information

### DETERMINING THE MICROENVIRONMENT AND PROTONATION STATE OF QUERCETIN ENCAPSULATED IN PILLAR[5]ARENE-BASED SUPRAMOLECULAR NANOCARRIERS

Marco Milone,<sup>a,†</sup> Martina Mazzaferro,<sup>a,†</sup> Salvatore Patanè,<sup>b</sup> Anna Notti,<sup>a</sup> Ilenia Pisagatti,<sup>a</sup> Giuseppe Gattuso,<sup>a</sup> Norberto Micali<sup>c</sup> and Valentina Villari\*<sup>c</sup>

<sup>a</sup>Dipartimento di Scienze Chimiche, Biologiche, Farmaceutiche ed Ambientali, Università degli Studi di Messina, Viale F. Stagno d'Alcontres 31, 98166 Messina, Italy.

<sup>b</sup>Dipartimento di Scienze Matematiche e Informatiche, Scienze Fisiche e Scienze della Terra, Università degli Studi di Messina, Viale F. Stagno d'Alcontres 31, 98166 Messina, Italy.

<sup>c</sup>CNR-IPCF Consiglio Nazionale delle Ricerche - Istituto per i Processi Chimico-Fisici, Viale F. Stagno d'Alcontres 37, 98158 Messina, Italy. E-mail: [valentina.villari@cnr.it](mailto:valentina.villari@cnr.it).

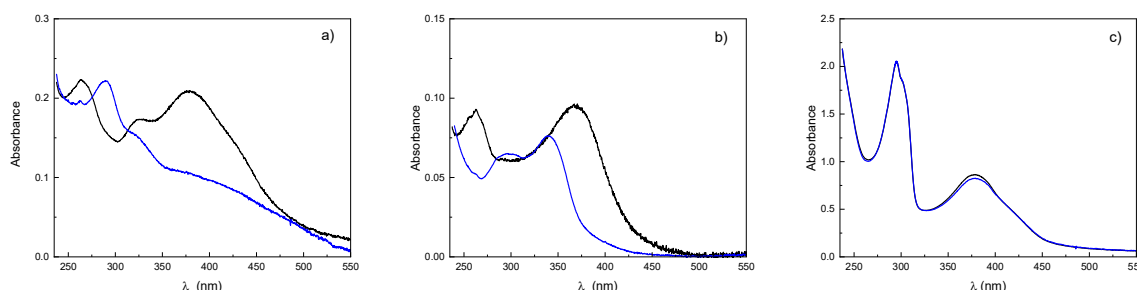

**Figure S1.** Effect of 1 week aging on quercetin: a) free; b) with CTAB; c) with CTAB/H nanoparticles (fresh solution: black curves, aged solutions: blue curves). The slight decrease observed at 378 nm for aged quercetin in the presence of CTAB/H can depend on some free quercetin molecules in the bulk (quercetin solubility in water is about  $3.5 \mu\text{g/mL}^{\text{S1}}$ ) or at the nanoparticle surface.

**Table S1.** Wavelength values and fluorescence intensity ratios of the two main contributions in the fluorescence spectra ( $\lambda_{\text{ex}}=370 \text{ nm}$ ).

| Sample   | $\lambda_1$ (nm) | $\lambda_2$ (nm) | $F_2/F_1$ |
|----------|------------------|------------------|-----------|
| Q        | 542              | 593              | 9         |
| CTAB/H/Q | -                | 603              | -         |
| CTAB/Q   | 545              | 593              | 3         |

**Table S2.** Wavelength values and intensity ratios of the main contributions in the excitation spectra at two emission wavelengths.

| Sample   | $\lambda_{em}=540$ nm |                  |                  |           |           | $\lambda_{em}=610$ nm |                  |                  |           |           |
|----------|-----------------------|------------------|------------------|-----------|-----------|-----------------------|------------------|------------------|-----------|-----------|
|          | $\lambda_1$ (nm)      | $\lambda_2$ (nm) | $\lambda_3$ (nm) | $I_1/I_2$ | $I_1/I_3$ | $\lambda_1$ (nm)      | $\lambda_2$ (nm) | $\lambda_3$ (nm) | $I_1/I_2$ | $I_1/I_3$ |
| Q        | 373                   | 407              | 437              | 1         | 0.9       | 372                   | 403              | 429              | 1.1       | 1.7       |
| CTAB/H/Q | 372                   | 400              | 425              | 1.6       | 1.9       | 379                   | 410              | 427              | 2.8       | 2.9       |
| CTAB/Q   | 370                   | -                | 421              | -         | 30        | 378                   | 408              | 427              | 3.4       | 3.1       |

**Table S3.** Fluorescence lifetimes obtained at  $\lambda_{em}=610$  nm with  $\lambda_{ex}=370$  nm

| Sample   | $A_1$ | $\tau_1$ ( $\pm 0.05$ ns) | $A_2$ | $\tau_2$ ( $\pm 0.05$ ns) | $\langle \tau \rangle$ (ns) |
|----------|-------|---------------------------|-------|---------------------------|-----------------------------|
| Q        | 0.997 | 0.15                      | 0.003 | 1.3                       | 0.18                        |
| CTAB/H/Q | 0.999 | 0.16                      | 0.001 | 1.2                       | 0.17                        |
| CTAB/Q*  | -     | -                         | -     | -                         | -                           |

\*Fluorescence emission of CTAB/Q is too low for reliable determination of fluorescence lifetimes

**Table S4.** Fluorescence lifetimes obtained at  $\lambda_{em}=540$  nm with  $\lambda_{ex}=370$  nm

| Sample   | $A_1$ | $\tau_1$ ( $\pm 0.05$ ns) | $A_2$ | $\tau_2$ ( $\pm 0.05$ ns) | $A_2$ | $\tau_2$ ( $\pm 0.1$ ns) | $\langle \tau \rangle$ (ns) |
|----------|-------|---------------------------|-------|---------------------------|-------|--------------------------|-----------------------------|
| Q        | 0.92  | 0.16                      | 0.075 | 0.89                      | 0.004 | 5.0                      | 0.8                         |
| CTAB/H/Q | 0.93  | 0.12                      | 0.062 | 0.46                      | 0.004 | 3.6                      | 0.5                         |
| CTAB/Q   | 0.98  | 0.13                      | 0.019 | 0.78                      | 0.002 | 3.8                      | 0.4                         |

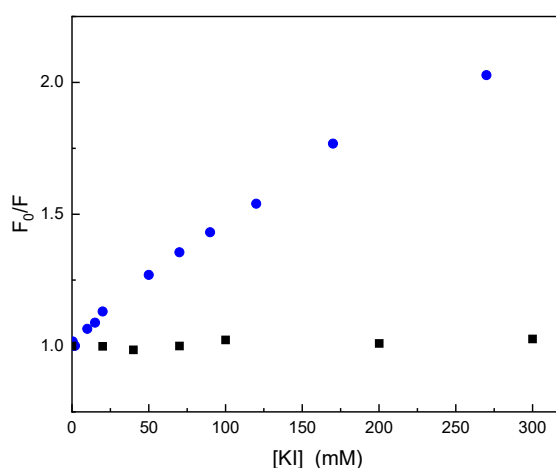

**Figure S2.** Fluorescence quenching experiment with the addition of potassium iodide (KI) for: CTAB/H nanoparticles prepared in a Rhodamine B aqueous solution (blue circles) and quercetin-loaded CTAB/H nanoparticles (black squares). See main text for more detail.
